# Supplementary material for: Global Covenant of Mayors, a dataset of greenhouse gas emissions for 6200 cities in Europe and the Southern Mediterranean countries
Source: Copernicus journal article supplement (doi:10.5194/essd-13-3551-2021), 2021-07-26
Supplement: Supplementary file 1 [file essd-13-3551-2021-supplement.zip]

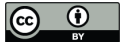

## *Supplement of*

# **Global Covenant of Mayors, a dataset of greenhouse gas emissions for 6200 cities in Europe and the Southern Mediterranean countries**

**Albana Kona et al.**

*Correspondence to:* Fabio Monforti-Ferrario ([fabio.monforti-ferrario@ec.europa.eu](mailto:fabio.monforti-ferrario@ec.europa.eu))

- `essd-13-3551-2021-supplement-title-page.pdf`
- `CoM_dataset2019.csv`
- `Code.pdf`
- `EDGAR_RCO_TCO_20052.csv`
- `Figure_2_GHG_emissions_per_capita.fig`
- `TechnicalValidationDataset.m`
- `createFit.m`
- `distribution.dfit`
- `matlab.mat`

The copyright of individual parts of the supplement might differ from the article licence.
